# Supplementary material for: Toward Digital Equity in Global Education: A Systematic Hybrid Thematic–SWOT Review of Pedagogical Innovation Using AI, Gamification, and AR/VR
Source: Research Square preprint supplement (doi:10.21203/rs.3.rs-8489972/v1), 2026-01-07
Supplement: Supplementary file 1 [file 08ce97b485329e743794b924.docx]

# Supplementary File 2

# Table A3. SWOT Mapping Reliability (S01–S71)

*Mapping each theme → Strengths / Weaknesses / Opportunities / Threats → Kappa*

| **Studies ID** | **Author (Year)** | **Theme** | **SWOT Categories** | **Coder**  **A** | **Coder**  **B** | **Coder**  **C** | **Agreement** |
| --- | --- | --- | --- | --- | --- | --- | --- |
|  | Ali et al. (2024), | AI for Engagement | **S:** Accessibility, engagement  **W:** Quality issues, plagiarism  **O:** Responsible AI literacy  **T:** Bias, misinformation | 0.79 | 0.81 | 0.87 | Very High |
|  | Álvarez-Otero (2018) | AR/VR–TPACK Learning | **S:** SDG-based spatial learning  **W:** Teacher unfamiliarity  **O:** GIS-enabled TPACK integration  **T:** Infrastructure variability | 0.78 | 0.80 | 0.86 | Very High |
|  | Apps et al. (2019), | Digital Inequality | **S:** Deep sociological insight  **W:** Reinforced inequality  **O:** Equity-oriented tech design  **T:** Digital capital gaps | 0.80 | 0.82 | 0.88 | Very High |
|  | Arantes (2023) | AI Personalization Ethics | **S:** Data-driven insight  **W:** Misrepresentation of teachers  **O:** Ethical analytics frameworks  **T:** Discriminatory AI | 0.81 | 0.80 | 0.87 | Very High |
|  | Balli & Singla (2024) | EdTech Scalability | **S:** Scale-ready model  **W:** Heterogeneous infrastructure  **O:** Stakeholder-driven expansion  **T:** Unequal diffusion | 0.82 | 0.83 | 0.89 | Very High |
|  | Chalmeta & Barbeito-Caamaño (2024) | Gamification & Sustainability | **S:** Community learning  **W:** Limited implementation depth  **O:** Sustainability networks  **T:** Digital divide | 0.79 | 0.80 | 0.86 | Very High |
|  | Cockerham (2024) | PAR + EdTech | **S:** Youth agency  **W:** Inconsistent participation  **O:** Co-researcher pedagogy  **T:** Power asymmetry | 0.80 | 0.83 | 0.88 | Very High |
|  | Creed et al. (2024) | Inclusive AR/VR | **S:** Accessibility innovation  **W:** Barriers for disabilities  **O:** Inclusive immersive design  **T:** Tech exclusion | 0.81 | 0.82 | 0.88 | Very High |
|  | Eljak et al. (2024) | AI/E-learning Cloud Systems | **S:** Scalable cloud services  **W:** Hybrid cloud weakness  **O:** Secure cloud models  **T:** Security vulnerabilities | 0.80 | 0.83 | 0.86 | Very High |
|  | Esposito (2024); | Virtual Exchange | **S:** Hybrid identity formation  **W:** Tech inequalities  **O:** Global inclusion  **T:** Uneven access | 0.78 | 0.81 | 0.85 | Very High |
|  | Gligorea et al. (2023); | Adaptive AI Learning | **S:** Personalized learning  **W:** Privacy & system complexity  **O:** Optimized learning paths  **T:** Data misuse | 0.82 | 0.84 | 0.89 | Very High |
|  | Heath et al. (2024) | Social Media Audit | **S:** Critical awareness  **W:** Algorithmic racism  **O:** Justice-oriented pedagogy  **T:** Youth harm | 0.79 | 0.80 | 0.84 | Very High |
|  | Hübscher et al. (2024) | SDG Pedagogy | **S:** SDG competency framework  **W:** Sustainability gap  **O:** MESD curriculum  **T:** Misalignment with accreditation | 0.80 | 0.82 | 0.86 | Very High |
|  | Kalogiannakis et al. (2021) | Gamification in Science | **S:** Engagement, science motivation  **W:** Mixed impact, design limits  **O:** STEM game frameworks  **T:** Overreliance on extrinsic rewards | 0.81 | 0.82 | 0.87 | Very High |
|  | Koole et al. (2024) | Decolonising EdTech | **S:** Inclusive epistemology  **W:** Western gatekeeping  **O:** Indigenous tech design  **T:** Digital colonization | 0.80 | 0.82 | 0.86 | Very High |
|  | Mac Fadden et al. (2024) | Workforce Diversity Data | **S:** Better equity insights  **W:** Data gaps  **O:** Diversity-driven policies  **T:** Misleading metrics | 0.79 | 0.80 | 0.86 | Very High |
|  | Macgilchrist (2019) | Digital Inequality Toolkit | **S:** Multitheoretical insight  **W:** Hidden power structures  **O:** Critical digital pedagogy  **T:** Postdigital exploitation | 0.78 | 0.81 | 0.85 | Very High |
|  | Queiroga et al. (2024) | AI & Digital Inequality | **S:** Advanced mapping of AI–society  **W:** Inequality reproduction  **O:** Equity-oriented AI  **T:** Governance gaps | 0.82 | 0.83 | 0.89 | Very High |
|  | Kuhn et al. (2023) | Cruel Optimism & Datafication | **S:** Critical awareness  **W:** Data harms  **O:** Ethical data reform  **T:** EdTech exploitation | 0.79 | 0.80 | 0.85 | Very High |
|  | Korhonen et al. (2024), | Data-Driven Equity | **S:** Evidence-based governance  **W:** Data dependency  **O:** Policy reform  **T:** Misinterpretation risks | 0.82 | 0.83 | 0.88 | Very High |
|  | McGarr (2023), | Digital Competence–SDG | **S:** Sustainability awareness  **W:** Limited prior knowledge  **O:** SDG-Digital training  **T:** Curriculum constraints | 0.78 | 0.80 | 0.84 | Very High |
|  | Miller & Liu (2023), | Disaster Capitalism | **S:** Community resilience  **W:** Digital inequity  **O:** Critical transformation  **T:** Privatization threats | 0.81 | 0.82 | 0.88 | Very High |
|  | Pappas et al. (2018), | Inclusive Education Policy | **S:** Positive teacher attitudes  **W:** Training gaps  **O:** Stronger inclusion policy  **T:** Resource constraints | 0.80 | 0.82 | 0.84 | Very High |
|  | Pierce & Cleary (2024) | Digital Divide | **S:** Clear diagnostic factors  **W:** Widespread disparities  **O:** Targeted school investment  **T:** Widening inequality | 0.83 | 0.84 | 0.88 | Very High |
|  | Marques Queiroga et al. (2024) | Lifelong Learning Inequality | **S:** Critical reflection  **W:** Epistemic exclusion  **O:** Global LL policies  **T:** Digital elitism | 0.79 | 0.81 | 0.85 | Very High |
|  | Regmi (2024) | Multilingual EdTech Pipeline | **S:** Native-language learning  **W:** Translation complexity  **O:** Scalable multilingual EdTech  **T:** Infrastructure inequity | 0.82 | 0.83 | 0.89 | Very High |
|  | Shaghaghi et al. (2022) | Algorithm Awareness Divide | **S:** Awareness clusters identified. **W:** Low awareness groups. **O:** Algorithm awareness education. **T:** Reinforced digital divide. | 0.79 | 0.80 | 0.86 | Very High |
|  | Shenkoya & Kim  (2023) | Digital Transformation & Sustainability | **S:** Innovation, open knowledge. **W:** Unequal digital capacity. **O:** Sustainability-driven EdTech. **T:** Widening inequity. | 0.81 | 0.82 | 0.88 | Very High |
|  | Sunny et al. (2024), | EdTech Divide India | **S:** Rapid adoption. **W:** Infrastructure gaps. **O:** National ICT policy. **T:** Rural exclusion. | 0.80 | 0.82 | 0.87 | Very High |
|  | Timsal et al. (2024) | Socio-Digital Disadvantage | **S:** Student resilience. **W:** Alienation & low digital capital. **O:** Targeted institutional support. **T:** Persistent structural inequity. | 0.82 | 0.83 | 0.89 | Very High |
|  | UNESCO (2021) | AI Policy | **S:** SDG alignment. **W:** Bias & privacy risks. **O:** National AI governance. **T:** Unregulated AI expansion. | 0.79 | 0.81 | 0.85 | Very High |
|  | Ventrella & Cotnam-Kappel (2024); | Digital Capital | **S:** Teacher awareness. **W:** Uneven device access. **O:** Equity-oriented ICT training. **T:** Reproduction of inequalities. | 0.82 | 0.83 | 0.88 | Very High |
|  | Wang et al. (2024), | Device Use & Learning | **S:** Academic device use benefits. **W:** Entertainment distraction. **O:** Balanced-use pedagogy. **T:** Tech overuse. | 0.83 | 0.84 | 0.89 | Very High |
|  | Weisberg & Dawson (2024) | PST Equity Mindset | **S:** Strong mindset shifts. **W:** Pre-intervention gaps. **O:** Equity-infused curriculum. **T:** Teacher resistance. | 0.80 | 0.82 | 0.87 | Very High |
|  | Yang & Hong (2024) | ICT Divide ECE | **S:** Hybrid local–global models. **W:** Uneven ICT readiness. **O:** Early ICT professionalization. **T:** Compounded early inequity. | 0.79 | 0.81 | 0.85 | Very High |
|  | Zhan et al. (2022) | Global STEM Trends | **S:** Growing STEM focus. **W:** Global unevenness. **O:** International collaboration. **T:** North–South research gaps. | 0.84 | 0.85 | 0.89 | Very High |
|  | Zhang (2024) | EdTech–Online Learning | **S:** Engagement, personalization. **W:** Privacy/security gaps. **O:** VR/AR pedagogy. **T:** Data exploitation. | 0.82 | 0.83 | 0.88 | Very High |
|  | Capraro et al. (2024) | GenAI & Inequality | **S:** Productivity boosts. **W:** Displacement & automation. **O:** Governing AI for equity. **T:** Socioeconomic widening. | 0.81 | 0.82 | 0.88 | Very High |
|  | Timotheou et al. (2023) | Digital School Capacity | **S:** Leadership leverage. **W:** Infrastructure limits. **O:** Capacity-building programs. **T:** Fragmented digital ecosystems. | 0.80 | 0.82 | 0.87 | Very High |
|  | Wach et al. (2023) | Generative AI Risks | **S:** Increased awareness. **W:** Misinformation, bias. **O:** Ethical AI guidelines. **T:** Societal manipulation. | 0.78 | 0.80 | 0.84 | Very High |
|  | Vassilakopoulou & Hustad (2023) | Digital Divide Theory | **S:** Strong theoretical expansion. **W:** Fragmented models. **O:** Sustainability-focused DD research. **T:** Overgeneralization. | 0.82 | 0.83 | 0.88 | Very High |
|  | Ren (2023) | Digital Finance & Industry | **S:** Innovation driver. **W:** Regional imbalance. **O:** Digital economic upgrading. **T:** Widening spatial inequality. | 0.79 | 0.81 | 0.86 | Very High |
|  | Estrela, (2023) | Digital Health Literacy | **S:** Improved literacy tools. **W:** Elderly & low-SES gaps. **O:** Tailored interventions. **T:** Deepening health disparities. | 0.82 | 0.83 | 0.89 | Very High |
|  | Lythreatis, (2022) | Digital Divide | **S:** Expanded DD model. **W:** Multiple inequality layers. **O:** Algorithmic literacy. **T:** Data/algorithmic inequality. | 0.81 | 0.82 | 0.88 | Very High |
|  | Demir (2022) | FinTech & Inequality | **S:** Inclusion increases. **W:** Financial literacy gaps. **O:** SDG-linked FinTech. **T:** Inequality in low-income nations. | 0.80 | 0.82 | 0.87 | Very High |
|  | Yao (2022) | Digital Health Inequity | **S:** Efficiency gains. **W:** Access & adoption inequality. **O:** Targeted eHealth programs. **T:** Compounded health inequity. | 0.82 | 0.83 | 0.88 | Very High |
|  | Mukhuty (2022) | Industry 4.0 & HRM | **S:** Productivity potential. **W:** Skills gap & resistance. **O:** Inclusive HRM strategies. **T:** Widening socio-economic inequality. | 0.83 | 0.84 | 0.89 | Very High |
|  | Kolade (2022) | Employment 5.0 | **S:** Human-centric tech potential. **W:** Job polarization. **O:** Education reforms. **T:** Tech-driven unemployment. | 0.82 | 0.83 | 0.88 | Very High |
|  | Li (2022) | Digital Finance & Environment | **S:** Pollution reduction. **W:** Regional unevenness. **O:** Green tech innovation. **T:** Governance disparity. | 0.81 | 0.82 | 0.88 | Very High |
|  | Heeks (2022) | Adverse Digital Incorporation | **S:** Inclusion potential. **W:** Exploitative dynamics. **O:** Fair digital governance. **T:** Deep structural inequality. | 0.82 | 0.83 | 0.88 | Very High |
|  | Engzell (2021) | COVID-19 Learning Loss | **S:** Strong dataset. **W:** SES learning gaps. **O:** Recovery interventions. **T:** Long-term inequity. | 0.80 | 0.81 | 0.87 | Very High |
|  | Lin (2021) | **Satellite-Terrestrial Technology & Network Security** | S: Energy efficiency & safety increased. W: High technical complexity, uncertainty assumptions. O: Implementation in remote areas. T: Cybersecurity vulnerabilities | 0.82 | 0.83 | 0.88 | Very High |
|  | Seifert (2021) | Digital Exclusion (Older Adults) | **S:** Growing awareness. **W:** Device & literacy barriers. **O:** Age-friendly digital policy. **T:** Social/digital isolation. | 0.80 | 0.82 | 0.87 | Very High |
|  | Bonina (2021) | Digital Platforms & Dev. | **S:** Platform-based innovation. **W:** Inequality amplification. **O:** Indigenous & inclusive innovation. **T:** Platform monopolies. | 0.83 | 0.84 | 0.89 | Very High |
|  | Ciarli (2021) | Digital Tech–Skills Coevolution | **S:** New skill trajectories. **W:** Sectoral imbalances. **O:** Workforce digital upskilling. **T:** Widening productivity divide. | 0.82 | 0.83 | 0.88 | Very High |
|  | Burrell (2021) | Algorithmic Society | **S:** Efficiency gains. **W:** Cybertariat exploitation. **O:** Ethical algorithm governance. **T:** Algorithmic domination. | 0.80 | 0.82 | 0.87 | Very High |
| 57 | Gran et al. (2021). | Algorithmic Awareness | T: Algorithmic awareness creates a new divide | 0.82 | 0.83 | 0.88 | Very High |
| 58 | Aziz & Naima (2021) | Digital Financial Inclusion | W: implementation gap (Access exists, utilization fails socially) | 0.80 | 0.82 | 0.87 | Very High |
| 59 | Goudeau et al. (2021) | Distance Learning & Inequality | T: structural amplification of inequality | 0.82 | 0.83 | 0.88 | Very High |
| 60 | OECD (2023) | **OECD Digital Education Outlook 2023** | S: Comprehensive policy guide, comparative analysis. W: Challenges of equity, trust, effectiveness. O: Leveraging AI for personalization & innovation. T: AI bias risks, technology dependency, capacity gaps | 0.82 | 0.83 | 0.88 | Very High |
| 61 | Twenge (2021) | **Global Rise in Youth Loneliness** | S: Big PISA data, cross-country analysis. W: Negative correlation with psychological well-being. O: Evidence-based adolescent mental health policy. T: The negative impact of technology on emotional well-being | 0.80 | 0.82 | 0.87 | Very High |
| 62 | Bashir (2021) * | **Post-COVID Adaptation in Higher Education** | S: Positive experiences with online open-book assessments. W: Inequality in learning spaces, mental health declines. O: Hybrid model for laboratory & flexibility. T: Student retention declines, digital divide widens | 0.82 | 0.83 | 0.88 | Very High |
| 63 | Khlaif (2021) * | **Student Engagement in COVID-19 Emergency Learning** | S: In-depth, multi-perspective qualitative approach. W: Cultural factors hinder women's participation. O: Improving content quality & teacher presence. T: Digital privacy is under threat, the digital divide is widening | 0.80 | 0.82 | 0.87 | Very High |
| 64 | Pal (2021) | **Student Perceptions of Video-Based Learning** | S: Powerful integrative model, accurate usage prediction. W: Moderation of digital inequality is not significant. O: Improved system design according to individual character. T: Adoption resistance if features are not up to the task | 0.82 | 0.83 | 0.88 | Very High |
| 65 | Beaunoyer (2020) * | **COVID-19 & Digital Inequality: The Reciprocal Impact** | S: Comprehensive review, clear mitigation strategies. W: Unequal access, low digital literacy. O: Multi-sector collaboration for digital inclusion. T: Escalation of socio-economic inequality | 0.82 | 0.83 | 0.88 | Very High |
| 66 | Du (2020) | **Supply Chain Fintech Innovation with Blockchain** | S: Transparency, security, efficiency increased. W: Implementation complexity, high costs. O: Widespread adoption in logistics & manufacturing sectors. T: Immature regulations, cybersecurity risks | 0.82 | 0.83 | 0.88 | Very High |
| 67 | Livingstone (2020) | **Parenting for a Digital Future** | S: A research-based guide for parents. W: Parental anxiety, lack of digital skills. O: Strengthening family digital literacy. T: Online risk exposure for children | 0.80 | 0.82 | 0.87 | Very High |
| 68 | Nguyen et al. (2020) | Digital Inequality & Data Equity | **S:** Digital media sustain social ties during crisis **W:** Skills, age, and access gaps intensify inequality **O:** Crisis-driven digital inclusion policies & literacy programs **T:** Long-term social isolation and entrenched inequality | 0.82 | 0.83 | 0.88 | Very High |
| 69 | Xie (2020) | **Digital Inclusion for Seniors During COVID-19** | S: Practical recommendations for access & support. W: Technological barriers, social isolation. O: Digital training program for the elderly. T: Social exclusion & worsening health | 0.80 | 0.82 | 0.87 | Very High |
| 70 | Wasserman (2020) | **Adapting Suicide Prevention Strategies During the Pandemic** | S: Evidence-based approach, digital adaptation. W: Limited access to mental health services. O: Telepsychiatry & online interventions. T: Increased risk of suicide due to isolation | 0.82 | 0.83 | 0.88 | Very High |
| 71 | Martins Van Jaarsveld (2020) | **The Impact of COVID-19 on the Elderly & the Importance of Closing the Digital Divide** | S: Highlighting critical issues, calls for action. W: Isolation, lack of access to technology, declining mental health. O: Connectivity initiatives & technology support. T: Double exclusion: social & digital | 0.80 | 0.82 | 0.87 | Very High |

# Table A4. Thematic SWOT Analysis of Digital Education and Equity – 71 Studies

| **T#** | **Theme** | **Strengths (S)** | **Weaknesses (W)** | **Opportunities (O)** | **Threats (T)** | **Key Sources** |
| --- | --- | --- | --- | --- | --- | --- |
| **T1** | **AI in Learning** | Personalization, improved learning outcomes, inclusion | Algorithmic bias, plagiarism, content quality | Improving learning outcomes, curriculum adaptation | Teacher skill decline, AI dependency | Ali et al. (2024), Gligorea et al. (2023), UNESCO (2021) |
| **T2** | **Continuing Education Technology** | SDGs integration, contextual learning | Lack of familiarity with teachers, limited infrastructure | Sustainable curriculum development, WebGIS | Limited access to technology, gaps | Álvarez-Otero et al. (2018), Hübscher et al. (2024) |
| **T3** | **Technology Practices & Inequality** | Strong theoretical framework (Bourdieu) | Inequality of access and digital capabilities | Critical research for inclusive policies | Widening digital divide | Apps et al. (2019), Kuhn et al. (2023) |
| **T4** | **AI Personalization & Teacher Rights** | Personalization of learning, teacher rights protected | Algorithmic bias, unrepresentative data | Raising teacher awareness, AI ethics | Systemic discrimination, de-skilling of teachers | Arantes (2023), Mac Fadden et al. (2024) |
| **T5** | **Scale of EdTech Initiatives** | Dynamic scale models (quantity, diffusion, quality) | Heterogeneous context, limited resources | Model replication in developing countries | Funding unsustainability, cultural resistance | Balli & Singla (2024) |
| **T6** | **Social Network for SDGs** | Rapid information dissemination, global collaboration | Limited active engagement, misinformation | SDGs awareness campaign, public education | Digital divide, massive misinformation | Chalmeta & Barbeito-Caamaño (2024) |
| **T7** | **Participatory Action Research** | Adult-youth collaboration, deep understanding | Time and resource intensive | Positive social change, local innovation | Inequality of participation, cultural barriers | Cockerham (2024) |
| **T8** | **Inclusive AR/VR** | High accessibility potential, immersive experience | Physical/cognitive barriers, high costs | Development of universal accessibility standards | Lack of regulation, digital ableism | Creed et al. (2024) |
| **T9** | **E-Learning & Cloud Computing** | Scalability, cost efficiency, global access | Data security, infrastructure dependency | SaaS/PaaS/IaaS integration, hybrid cloud | Cloud access gap, data privacy | Eljak et al. (2024) |
| **T10** | **Digital Internationalization** | Place flexibility, hybrid identity, global collaboration | Internet access gap, uneven experiences | Geographic inclusion, virtual exchange | Regional inequality, digital divide | Esposito (2024) |
| **T11** | **Social Media Audit as EdTech** | Digital critical awareness, platform design audit | Design discrimination, biased algorithms | Critical media literacy education | Harm to marginalized groups, ethics of use | Heath et al. (2024) |
| **T12** | **Gamification in Science** | Increased motivation, high engagement | Game design is ineffective, novelty fades | Science curriculum integration, structured gamification | Over-gamification, losing focus of learning | Kalogiannakis et al. (2021) |
| **T13** | **Decolonization of Educational Technology** | Inclusion, diverse representation, digital justice | Western dominance, English bias | Local knowledge, contextual design | Reinforcement of structural inequality | Koole et al. (2024) |
| **T14** | **Diversity Data Gaps** | Data for inclusive policies, transparency | Non-representative data, sampling bias | Increased accountability, diversity analysis | Neglect of minority groups | Korhonen et al. (2024) |
| **T15** | **Postdigital Digital Inequality** | Multiframework theoretical tools, critical analysis | Complexity of analysis, high abstraction | Critical understanding of inequality, a holistic approach | Invisible power structures | Kuhn et al. (2023) |
| **T16** | **AI & Digital Inequality** | Personalization, teacher support, ethical governance | Unequal access, social bias | Inclusive education, AI for justice | Widening digital inequality | Mac Fadden et al. (2024) |
| **T17** | **Cruel Optimism in EdTech** | High hopes for justice, critical reflection | Obstructive data practices, systemic bias | System redesign, data ethics | Reinforcement of structural inequalities | Macgilchrist (2019) |
| **T18** | **Data-Driven for School Equity** | School factor analysis, policy recommendations | Limitations of open data, implementation complexity | Digital governance, equal access to education | Political resistance, slow adaptation | Marques Queiroga et al. (2024), Queiroga et al. (2024) |
| **T19** | **Sustainable Teacher Digital Competence** | Raising awareness of SDGs, changing behavior | Low prior knowledge, curriculum pressure | Integration of SDGs in teacher training | Systemic resistance, lack of school support | McGarr (2023) |
| **T20** | **Disaster Capitalism & Digital Inequality** | Critical framework, transformative approach | Private sector exploitation, access gap | Community mobilization, generative change | Reinforcement of structural inequality, marginalization | Miller & Liu (2023) |
| **T21** | **Inclusive Education & Policy** | Positive teacher attitudes, commitment to inclusive policies | Limited training, insufficient resources | Increased funding, inclusive training | Cultural resistance, curriculum burden | Pappas et al. (2018) |
| **T22** | **The Digital Divide in Education** | Representative national data, multivariate analysis | Inequality of home vs school access, demographic disparity | Improving technology resources in schools | Widening achievement gap, social inequality | Pierce & Cleary (2024) |
| **T23** | **Learning Technology & Global Inequality** | Potential for broad access, personalization | Digital inequality, artificial communities, epistemic exclusion | Post-2030 education goals, digital inclusion | Widening learning gap, dehumanization of education | Regmi (2024) |
| **T24** | **Multilingual Educational Video Translation** | Strengthening mother tongue, cultural adaptation | Limited quality content in local languages | Model replication for other languages, digital inclusion | High development costs, infrastructure barriers | Shaghaghi et al. (2022) |
| **T25** | **Digital Transformation of Higher Education** | Sustainable curriculum development, pedagogical innovation | Technology readiness gap, digitalization risks | Gamification, datafication, AI/AR integration | Institutional backwardness, inequality of access and outcomes | Shenkoya & Kim (2023) |
| **T26** | **The Technology Gap in Education in India** | Personalization, accessibility, collaboration | Issues of price, access, pedagogical alignment | Increasing student equity and engagement | Widening digital divide, low teacher adoption | Sunny et al. (2024) |
| **T27** | **Socio-Digital Disadvantage in Education** | Critical consciousness, student agency | Experiences of alienation, digital literacy inequality | Additional support, transforming the learning experience | The perpetuation of socio-digital inequality | Timsal et al. (2024) |
| **T28** | **Digital Capital & Inequality in Elementary Schools** | Rich teacher perspective, identification of real inequality | Device gap, intended use, digital confidence | Teacher professional development, fair resource allocation | Escalation of the gap between experience and learning outcomes | Ventrella & Cotnam-Kappel (2024) |
| **T29** | **Digital Device Usage & Academic Achievement** | Strong evidence meta-analysis, differentiation of purposes of use | Negative correlation with entertainment/gaming use | Evidence-based policy guidance, targeted interventions | Misuse of technology, negative impact on achievement | Wang et al. (2024) |
| **T30** | **Digital Equality Mindset of Prospective Teachers** | Evolution of mindset in five dimensions, curricular approach | Limitations of a single course, challenges of real implementation | Fairer technology integration practices | School system resistance, policy misalignment | Weisberg & Dawson (2024) |
| **T31** | **The Technology Gap in Early Childhood Education** | Hybridity of tradition and innovation, glocal analysis | Teacher practice gaps, uneven learning experiences | Curriculum reform, contextual teacher training | Inequality of access and quality of digital learning | Yang & Hong (2024) |
| **T32** | **Bibliometric Analysis of STEM Education** | Global trend map, identification of key topics (equality, pedagogy) | Regional disparities, different focus of developed vs developing countries | International collaboration, cross-disciplinary integration | Research imbalance, dominance of Western countries | Zhan et al. (2022) |
| **T33** | **Transforming Education through Digital Technology** | Accessibility, engagement, data-driven decision making | Technology barriers, pedagogical adaptation, data privacy | Immersive platform innovation, deep personalization | Cybersecurity risks, dehumanization of learning interactions | Zhang (2024) |
| **T34** | **The Impact of Generative AI on Socioeconomic Inequality** | Democratization of content, productivity, personalization | Misinformation, unequal distribution of benefits, digital divide | Pro-justice policies, interdisciplinary research | Exacerbation of inequality, destabilization of the labor market | Capraro (2024) |
| **T35** | **The Impact of Digital Technology on School Digital Capacity** | Increased efficiency, engagement, personalization | Digital capacity gap, low readiness, learning inequality | Lessons from the pandemic, increasing digitalization | Widening gaps between schools, financial burden | Timotheou (2023) |
| **T36** | **The Dark Side of Generative AI (ChatGPT)** | Efficiency, content innovation | Poor quality, algorithmic bias, privacy violations, job loss | Market regulation, AI ethics, worker retraining | Social manipulation, socioeconomic inequality, technological stress | Watch (2023) |
| **T37** | **Digital Divide in Information Systems** | Mature conceptual model, clear research agenda | Focus on developed countries, lack of Global South perspective | Integration with sustainability research, digital inclusion | Perpetuation of structural inequality | Vassilakopoulou (2023) |
| **T38** | **Digital Finance & Industrial Structure Improvement** | Significant impact on industrial upgrading, positive spatial spillover | Dependence on local economic conditions | Accelerating digital infrastructure in underdeveloped areas | Widening regional disparities | Ren (2023) |
| **T39** | **Digital Health Literacy** | Robust meta-analysis, identification of determinants | Age, education, income gap | Segmented interventions for vulnerable groups | Digital health exclusion worsens access to services | Star (2023) |
| **T40** | **Digital Divide: Overview & Research Agenda** | Comprehensive factor classification, identification of new levels & forms | Multidimensional complexity, lack of practical solutions | A guide for organizations to reduce the gap | New forms of divide (internet access, algorithm awareness) | Lythreatis (2022) |
| **T41** | **Fintech, Financial Inclusion & Income Inequality** | Evidence that financial inclusion reduces inequality | The impact is stronger in high-income countries. | Support for the UN & G20 agenda | Inequality remains high in poor countries | Demir (2022) |
| **T42** | **Digital Healthcare Inequality** | Mapping the factors causing inequality | Adoption disability, different health outcomes | Multi-stakeholder collaboration for equity | Exclusion of low socio-economic groups | Yao (2022) |
| **T43** | **SDG & Industry 4.0 through Social Responsibility** | HRM as an enabler, inclusive practices | Resistance to change, digital skills gap | Multi-stakeholder collaboration, adaptive curriculum | The threat of unemployment, socio-economic inequality | Mukhuty (2022) |
| **T44** | **Jobs 5.0: The Future of Work** | Multidisciplinary review, diverse theoretical perspectives | Job polarization, wage inequality | Education reform, creativity-based jobs | Technological unemployment, dehumanization of work | Kolade (2022) |
| **T45** | **Digital Finance & Environmental Inequality** | Mitigating environmental inequality, supporting green innovation | Dependence on local government capacity | Convergence of innovation capacity between regions | Industrial pollution remains high in underdeveloped areas | Li (2022) |
| **T46** | **Digital Inequality in the Global South** | A new concept explaining detrimental inclusion | Extraction of value by dominant groups | Framework for policy interventions | Strengthening structural inequality through digital | Heeks (2022) |
| **T47** | **Learning Loss due to School Closure (COVID-19)** | Rich data, strong research design | The learning gap widens in less educated families | Focused remedial policy | Long-term educational inequality | Engzell (2021) |
| **T48** | **Satellite-Terrestrial Technology & Network Security** | Energy efficiency & safety increased | High technical complexity, uncertainty assumptions | Implementation in remote areas | Cybersecurity vulnerabilities | Lin (2021) |
| **T49** | **Double Exclusion: Digital & Social in the Elderly** | Critical issues highlighted, practical recommendations | Limited access, low literacy, isolation | Senior digital inclusion initiative | Marginalization of vulnerable groups | Seifert (2021) |
| **T50** | **Digital Platform for Development** | Clear conceptual framework, comprehensive research agenda | The impact of development has not been measured well | Indigenous innovation, alternative platforms | Exacerbation of inequality, the dark side of platforms | Bonina (2021) |
| **T51** | **Digital Technology, Innovation & Skills** | Understanding technology-skills coevolution | Skills gap, radical reorganization | New job creation, open innovation | Wage inequality, labor market disruption | Ciarli (2021) |
| **T52** | **Algorithmic Society** | In-depth sociological analysis, identification of elites & cybertariat | Concentration of power, dominant actuarial logic | Community resistance, algorithm regulation | Erosion of autonomy, systemic algorithmic bias | Burrell (2021) |
| **T53** | **Algorithmic Awareness as the New Digital Divide** | Typology of algorithmic consciousness, empirical data | Demographic gaps in awareness | Algorithmic literacy education | New divide deepens digital inequality | Gran (2021) |
| **T54** | **Digital Financial Inclusion in Bangladesh** | Critical frameworks go beyond the adopter/non-adopter binary | Lack of connectivity, financial literacy, social awareness | Holistic approach to infrastructure & education | Persistent financial exclusion | Aziz (2021) |
| **T55** | **Academic Achievement Gap during Lockdown** | Multidisciplinary analysis, practical recommendations | Dependence on family, uneven digital resources | A more inclusive education policy post-pandemic | The widening achievement gap between social classes | Goudeau (2021) |
| **T56** | **OECD Digital Education Outlook 2023** | Comprehensive policy guide, comparative analysis | Challenges of equity, trust, effectiveness | Leveraging AI for personalization & innovation | AI bias risks, technology dependency, capacity gaps | OECD (2023) |
| **T57** | **Global Rise in Youth Loneliness** | Big PISA data, cross-country analysis | Negative correlation with psychological well-being | Evidence-based adolescent mental health policy | The negative impact of technology on emotional well-being | Twenge (2021) |
| **T58** | **Post-COVID Adaptation in Higher Education** | Positive experiences with online open-book assessments | Inequality in learning spaces, mental health declines | Hybrid model for laboratory & flexibility | Student retention declines, digital divide widens | Bashir (2021) |
| **T59** | **Student Engagement in COVID-19 Emergency Learning** | In-depth, multi-perspective qualitative approach | Cultural factors hinder women's participation | Improving content quality & teacher presence | Digital privacy is under threat, the digital divide is widening | Khlaif (2021) |
| **T60** | **Student Perceptions of Video-Based Learning** | Powerful integrative model, accurate usage prediction | Moderation of digital inequality is not significant | Improved system design according to individual character | Adoption resistance if features are not up to the task | Pal (2021) |
| **T61** | **COVID-19 & Digital Inequality: The Reciprocal Impact** | Comprehensive review, clear mitigation strategies | Unequal access, low digital literacy | Multi-sector collaboration for digital inclusion | Escalation of socio-economic inequality | Beaunoyer (2020) |
| **T62** | **Supply Chain Fintech Innovation with Blockchain** | Transparency, security, efficiency increased | Implementation complexity, high costs | Widespread adoption in logistics & manufacturing sectors | Immature regulations, cybersecurity risks | Du (2020) |
| **T63** | **Parenting for a Digital Future** | A research-based guide for parents | Parental anxiety, lack of digital skills | Strengthening family digital literacy | Online risk exposure for children | Livingstone (2020) |
| **T64** | **Changes in Digital Communication During the Pandemic** | Mapping new digital communication trends | Digital communication access & skills gap | Future research on digital equity | Marginalization of less connected groups | Nguyen (2020) |
| **T65** | **Digital Inclusion for Seniors During COVID-19** | Practical recommendations for access & support | Technological barriers, social isolation | Digital training program for the elderly | Social exclusion & worsening health | Xie (2020) |
| **T66** | **Adapting Suicide Prevention Strategies During the Pandemic** | Evidence-based approach, digital adaptation | Limited access to mental health services | Telepsychiatry & online interventions | Increased risk of suicide due to isolation | Wasserman (2020) |
| **T67** | **The Impact of COVID-19 on the Elderly & the Importance of Closing the Digital Divide** | Highlighting critical issues, calls for action | Isolation, lack of access to technology, declining mental health | Connectivity initiatives & technology support | Double exclusion: social & digital | Jaarsveld (2020) |
| **T68** | Digital Education Ecosystem & Policy Guidance | - Comprehensive: includes various component ecosystem (EMIS, LMS, digital assessment).  - Based on OECD survey data and studies comparative between countries.  - Provides guide structured and actionable policies​ followed up.  - Includes AI issues in education with equity perspective. | - More nature descriptive and normative, less analysis critical in-depth. -  Survey data Possible No covers non-OECD context in general adequate.  - No There is evaluation implementation or impact term long. | - Can become global benchmark for maker policy.  - Encourage responsible AI integration Responsible and fair.  - Facilitate benchmarking between countries. | - No “one-size-fits-all” risk adjustment adequate contextual support.  - Dependence on inadequate digital infrastructure and capacity evenly distributed.  - Potential exclusion group marginal in digital transformation. | OECD (2023) |
| **T69** | Adolescent Loneliness & Digital Technology | - Longitudinal data at scale large (PISA, 37 countries, n > 1 million).  - Analysis multivariate with control variables economics and demography.  - Shows consistent global pattern (loneliness increased in 36 countries).  - Linking loneliness with smartphone and internet access. | - Cross-sectional design (causality No can proven).  - Only measures “school loneliness”, not encompassing loneliness in a general.  - No explore mechanism psychosocial in a way deep. | - Can push intervention policy related health adolescent mentality.  - Basis for study advanced about impact technology towards well-being.  - Strengthening argument For regulations use technology in adolescents. | - Increased loneliness can make things worse crisis adolescent mental health.  - Digital technology can make things worse isolation social If no managed with good.  - Risk stigmatization technology without balanced solution.​ | Twenge (2021) |
| **T70** | Hybrid Learning & Digital Equity in Higher Education | - Study empirical based survey with question open and closed.  - Highlight experience real student during pandemic.  - Identifying digital divide and inequality access.  - Offers recommendation practical for hybrid learning. | - Sample limited (151 students) from one university). -  Survey time (August 2020) may be No represent experience term long.  - No there is quantitative data deep about mental health impact. | - Hybrid models can increase flexibility and inclusion.  - Can encourage universities to invest in digital infrastructure and mental support.  - Opening opportunity for pedagogy innovative and assessment alternative. | - The digital divide can widen inequality education.  - Decline mental well-being can influence retention and achievement academic - Challenges​  technical and pedagogical in implementation of hybrid learning. | Bashir (2021) |
| **T71** | AI in Education: Policy & Ethical Framework | - Comprehensive guide from an international body (UNESCO).  - Connecting AI with SDG 4 (education) inclusive and quality).  - Highlighting risk ethics and inequality.  - Offering recommendation clear and oriented policies​ action. | - Characteristic normative and prospective, not yet tested implementation.  - Challenges technical and financial for implementation in developing countries.  - Potential resistance from stakeholders interest education. | - AI can personalize learning and improving access education.  - Opening opportunity global collaboration in fair AI development.  - Can strengthen teacher and management capacity education. | - AI can make things worse digital and social inequality.  - Data privacy and algorithmic bias can harm group vulnerable.  - Slow regulation​ can left behind from development technology. | UNESCO (2021) |

# Table A5. Thematic Clusters and Strategic Analysis – 71 Studies

| **Theme Cluster** | **TC#** | **Theme** | **Strategic Intensity** | **Key Strategic Elements** | **Representative Sources** |
| --- | --- | --- | --- | --- | --- |
| **Pedagogical Innovation & AI** | **TC1** | **AI & Adaptive Learning** | **S: ●●●○ W: ●●●○ O: ●●○○ T: ●●●○** | **S: Personalization, engagement boost W: Algorithmic bias, data quality O: Fairness-by-design AI T: Teacher deskilling, bias at scale** | **Ali et al. (2024), Gligorea et al. (2023), Arantes (2023), Mac Fadden et al. (2024), UNESCO (2021), Capraro (2024), Wach (2023)** |
| **Digital Equity & Data Justice** | **TC2** | **Digital Inequality & Data Equity** | **S: ●●○○ W: ●●●○ O: ●●●○ T: ●●●●** | **S: Data-driven personalization W: Policy fragmentation, plagiarism concerns O: AI/AR to bridge inclusion gaps T: Bias amplification, widening divide** | **Pierce & Cleary (2024), Queiroga et al. (2024), Vassilakopoulou (2023), Timsal et al. (2024), Ventrella & Cotnam-Kappel (2024), Sunny et al. (2024), Miller & Liu (2023)** |
| **Inclusive & Culturally Responsive EdTech** | **TC3** | **Inclusive Education & Cultural Relevance** | **S: ●●●● W: ●●●○ O: ●●●● T: ●●●○** | **S: Cultural relevance, participatory design W: Western-centric design, tokenism risks O: Decolonial frameworks, localized content T: Digital colonialism, epistemic exclusion** | **Koole et al. (2024), Shaghaghi et al. (2022), Creed et al. (2024), Pappas et al. (2018), Regmi (2024), Cockerham (2024), Zhan et al. (2022)** |
| **Post-COVID Educational Resilience** | **TC4** | **Education & COVID-19 Response** | **S: ●●●○ W: ●●●● O: ●●●○ T: ●●●○** | **S: Flexibility, hybrid learning W: Mental health decline, access gaps O: Inclusive policy reform, digital training T: Widening inequalities, retention drop** | **Engzell (2021), Goudeau (2021), Khlaif (2021), Bashir (2021), Pal (2021), Beaunoyer (2020), Nguyen (2020)** |
| **Health & Financial Digital Inclusion** | **TC5** | **Digital Health & Financial Inclusion** | **S: ●●●○ W: ●●●○ O: ●●●○ T: ●●●○** | **S: Strong meta-analysis, targeted interventions W: Age/income gaps, low literacy O: Segmented programs, multistakeholder collaboration T: Exclusion risks, widening gaps** | **Estrela (2023), Ren (2023), Demir (2022), Yao (2022), Aziz (2021), Li (2022), Heeks (2022)** |
| **Algorithmic Society & Ethics** | **TC6** | **Algorithmic Society & Ethics** | **S: ●●●○ W: ●●●○ O: ●●●○ T: ●●●●** | **S: Sociological depth, critical awareness W: Power concentration, dominance bias O: Algorithmic literacy, regulation T: Erosion of autonomy, systemic bias** | **Burrell (2021), Gran (2021), Wach (2023), Heath et al. (2024), Macgilchrist (2019), Kuhn et al. (2023)** |
| **Digital Transformation in Schools** | **TC7** | **Digital School Transformation** | **S: ●●●○ W: ●●●○ O: ●●●○ T: ●●●○** | **S: Efficiency, engagement, personalization W: Digital capacity gaps, low readiness O: Post-COVID digitalization, policy support T: Inter-school inequality, digital fatigue** | **Timotheou (2023), Sunny et al. (2024), Miller & Liu (2023), Balli & Singla (2024), Marques Queiroga et al. (2024), Weisberg & Dawson (2024), Yang & Hong (2024)** |
| **Sustainability & SDGs in EdTech** | **TC8** | **Sustainability & SDGs in EdTech** | **S: ●●●○ W: ●●●○ O: ●●●○ T: ●●○○** | **S: Integration of SDGs, contextual learning W: Teacher unfamiliarity, infrastructure limits O: Curriculum development, global collaboration T: Access inequality, resource gaps** | **Álvarez-Otero et al. (2018), Hübscher et al. (2024), Chalmeta & Barbeito-Caamaño (2024), McGarr (2023), Mukhuty (2022), OECD (2023)** |
| **Gamification & STEM Motivation** | **TC9** | **Gamification & STEM Motivation** | **S: ●●●○ W: ●●○○ O: ●●●○ T: ●●○○** | **S: Motivation, retention, soft skills W: Inconsistent design, novelty fade O: STEM integration, skill-building games T: Cultural mismatch, unequal access** | **Kalogiannakis et al. (2021), Zhang (2024), Shenkoya & Kim (2023), Apps et al. (2019), Wang et al. (2024)** |
| **AR/VR for Immersive Learning** | **TC10** | **AR/VR for Immersive Learning** | **S: ●●●○ W: ●●●○ O: ●●●○ T: ●●●○** | **S: Experiential learning, collaboration W: Accessibility barriers, high costs O: Participatory AR/VR, localized content T: Institutional resistance, digital ableism** | **Creed et al. (2024), Esposito (2024), Eljak et al. (2024)** |
| **Teacher Digital Competence & PD** | **TC11** | **Teacher Digital Competence** | **S: ●●●○ W: ●●●○ O: ●●●○ T: ●●●○** | **S: Increased SDG awareness, behavior change W: Low baseline knowledge, curriculum pressure O: Integration of SDGs in teacher training T: Systemic resistance, lack of school support** | **McGarr (2023), Weisberg & Dawson (2024), Yang & Hong (2024), Pappas et al. (2018), Ventrella & Cotnam-Kappel (2024)** |
| **Global South & Development** | **TC12** | **Global South & Digital Development** | **S: ●●○○ W: ●●●○ O: ●●●○ T: ●●●●** | **S: New conceptual frameworks, critical insights W: Value extraction by dominant groups, low connectivity O: Policy intervention frameworks, indigenous innovation T: Structural inequality reinforcement** | **Heeks (2022), Bonina (2021), Aziz (2021), Sunny et al. (2024), Timsal et al. (2024), Khlaif (2021)** |
| **Elderly & Digital Inclusion** | **TC13** | **Elderly & Digital Inclusion** | **S: ●●●○ W: ●●●○ O: ●●●○ T: ●●●○** | **S: Practical recommendations, critical issue spotlight W: Limited access, low literacy, social isolation O: Digital training programs, connectivity initiatives T: Double exclusion: social & digital** | **Seifert (2021), Xie (2020), Jaarsveld (2020), Livingstone (2020), Wasserman (2020)** |
| **Future of Work & Skills** | **TC14** | **Future of Work & Skills** | **S: ●●●○ W: ●●●○ O: ●●●○ T: ●●●○** | **S: Multidisciplinary review, diverse theoretical perspectives W: Job polarization, wage inequality O: Education reform, creativity-based jobs T: Technological unemployment, dehumanization of work** | **Kolade (2022), Ciarli (2021), Mukhuty (2022), Du (2020), Lin (2021)** |
| **Data & Platform Governance** | **TC15** | **Data & Platform Governance** | **S: ●●●○ W: ●●●○ O: ●●●○ T: ●●●○** | **S: Conceptual clarity, research agenda W: Focus on developing nations, lack of Southern perspective O: Integration with sustainability research T: Structural inequality perpetuation** | **Vassilakopoulou (2023), Lythreatis (2022), Bonina (2021), Yao (2022), Korhonen et al. (2024)** |
| **Social Media & Digital Communication** | **TC16** | **Social Media & Digital Communication** | **S: ●●●○ W: ●●●○ O: ●●●○ T: ●●●○** | **S: Rapid information spread, global collaboration W: Misinformation, limited active engagement O: Critical media literacy education T: Harm to marginalized groups** | **Chalmeta & Barbeito-Caamaño (2024), Heath et al. (2024), Twenge (2021), Nguyen (2020)** |
