# Supplementary material for: Toward Digital Equity in Global Education: A Systematic Hybrid Thematic–SWOT Review of Pedagogical Innovation Using AI, Gamification, and AR/VR
Source: Research Square preprint supplement (doi:10.21203/rs.3.rs-8489972/v1), 2026-01-07
Supplement: Supplementary file 2 [file 181f71368857a10862412ef6.docx]

# Appendix

## **Table A1**. Methodological Quality Appraisal of Included Studies (NOS/CASP)

| **No** | **Author(s), Year** | **Study Design** | **Appraisal Tool** | **Key Quality Criteria Assessed*** | **Score / Rating** | **Quality Level** |
| --- | --- | --- | --- | --- | --- | --- |
|  | Ali et al. (2024) * | Systematic Review | CASP | Clear aims; rigorous search; transparent synthesis; limitations addressed | High | High |
|  | Álvarez-Otero (2018) * | Mixed Methods | CASP | Clear research design; appropriate data collection; triangulation | Moderate–High | Moderate |
|  | Apps et al. (2019) * | Qualitative | CASP | Theoretical coherence; reflexivity; analytical rigor | High | High |
|  | Arantes (2023) * | Conceptual / Policy Analysis | CASP | Argument coherence; use of evidence; policy relevance | Moderate | Moderate |
|  | Balli & Singla (2024)* | Case Study | CASP | Context clarity; methodological transparency; analytical depth | High | High |
|  | Chalmeta & Barbeito-Caamaño (2024) | Framework Development | CASP | Conceptual grounding; applicability; validation logic | Moderate | Moderate |
|  | Cockerham (2024) * | Meta-synthesis (PAR) | CASP | Methodological justification; synthesis rigor | High | High |
|  | Creed et al. (2024)* | Qualitative / Stakeholder Study | CASP | Sampling clarity; stakeholder diversity; analytical transparency | High | High |
|  | Eljak et al. (2024) * | Systematic Review | NOS | Selection (2); comparability (2); outcome assessment (3) | High | High |
|  | Esposito (2024) * | Qualitative (FGD) | CASP | Data saturation; coding transparency; reflexivity | High | High |
|  | Gligorea et al. (2023) * | Literature Review | NOS | Search rigor; synthesis clarity; handling bias | High | High |
|  | Heath et al. (2024) * | Technological Audit | CASP | Analytical rigor; ethical positioning; evidence coherence | High | High |
|  | Hübscher et al. (2024) | Bibliometric Review | NOS | Data source clarity; analytical transparency | High | High |
|  | Kalogiannakis et al. (2021)* | Systematic Review | NOS | Selection (2); comparability (2); outcomes (3) | High | High |
|  | Koole et al. (2024)* | Conceptual / Critical Review | CASP | Theoretical depth; critical reflexivity | High | High |
|  | Mac Fadden et al. (2024)* | Bibliometric Analysis | NOS | Database coverage; rigor mapping | High | High |
|  | Macgilchrist (2019) * | Ethnographic | CASP | Contextual depth; analytical transparency | High | High |
|  | Queiroga et al. (2024)* | Quantitative Policy Study | NOS | Sampling (2); comparability (2); outcomes (3) | High | High |
|  | Kuhn et al. (2023) * | Theoretical Synthesis | CASP | Conceptual integration; analytical coherence | High | High |
|  | Korhonen et al. (2024) * | Quantitative Workforce Analysis | NOS | Data integrity; analytical rigor | High | High |
|  | McGarr (2023) * | Survey-based Empirical Study | NOS | Sampling (2); comparability (2); outcome measurement (3) | High | High |
|  | Miller & Liu (2023) * | Critical Theoretical Analysis | CASP | Conceptual rigor; analytical coherence; policy relevance | High | High |
|  | Pappas et al. (2018) * | Quantitative Survey | NOS | Selection (2); comparability (2); outcome assessment (3) | High | High |
|  | Pierce & Cleary (2024) * | Large-scale Quantitative Study | NOS | Representative sampling (3); comparability (2); statistical rigor (3) | High | High |
|  | Marques Queiroga et al. (2024) | Data-driven Policy Analysis | NOS | Data integrity (3); comparability (2); outcome robustness (3) | High | High |
|  | Regmi (2024) * | Critical Conceptual Analysis | CASP | Theoretical grounding; reflexivity; global relevance | High | High |
|  | Shaghaghi et al. (2022) | Applied Design / Pipeline Study | CASP | Design clarity; cultural alignment; implementation logic | Moderate–High | Moderate |
|  | Shenkoya & Kim  (2023) * | Systematic Review & Bibliometrics | NOS | Search rigor (3); comparability (2); synthesis clarity (3) | High | High |
|  | Sunny et al. (2024) * | Narrative Review / Policy Analysis | CASP | Argument coherence; critical balance; relevance to equity | Moderate | Moderate |
|  | Timsal et al. (2024) * | Qualitative Phenomenographic Study | CASP | Methodological transparency; analytical depth; reflexivity | High | High |
|  | UNESCO (2021) * | Policy Guidance Document | CASP | Evidence integration; ethical grounding; global applicability | High | High |
|  | Ventrella & Cotnam-Kappel (2024) * | Qualitative Case Study | CASP | Sampling rationale; data saturation; analytical transparency | High | High |
|  | Wang et al. (2024) * | Meta-analysis | NOS | Study selection (3); comparability (2); statistical validity (3) | High | High |
|  | Weisberg & Dawson (2024) * | Qualitative Longitudinal Study | CASP | Design coherence; analytical rigor; pedagogical relevance | High | High |
|  | Yang & Hong (2024) * | Qualitative Case Study | CASP | Contextual depth; triangulation; analytical transparency | High | High |
|  | Zhan et al. (2022) * | Bibliometric Analysis | NOS | Data source rigor (3); mapping validity (2); interpretive clarity (2) | High | High |
|  | Zhang (2024)* | Conceptual / Applied Review | CASP | Argument coherence; technological relevance; limited awareness | Moderate | Moderate |
|  | Capraro et al. (2024) * | Interdisciplinary Critical Review | CASP | Analytical rigor; policy integration; interdisciplinary validity | High | High |
|  | Timotheou et al. (2023) | Narrative Literature Review | CASP | Thematic coherence; evidence linkage; analytical transparency | Moderate–High | Moderate |
|  | Wach et al. (2023) | Critical Conceptual Analysis | CASP | Conceptual depth; risk taxonomy clarity; policy relevance | High | High |
|  | Vassilakopoulou & Hustad (2023) | Systematic Literature Review & Research Agenda | CASP | Review rigor; conceptual mapping; coherence agenda | High | High |
|  | Ren (2023) | Longitudinal Panel Quantitative Study | NOS | Selection (3); comparability (2); outcome robustness (3) | High | High |
|  | Star, (2023) | Systematic Review & Meta-analysis | NOS | Search rigor (3); comparability (2); statistical validity (3) | High | High |
|  | Lythreatis, (2022) | Systematic Review | NOS | Study selection (3); thematic synthesis (2); analytical clarity (3) | High | High |
|  | Demir (2022) | Cross-national Panel Quantitative Study | NOS | Sampling (3); comparability (2); outcome measurement (3) | High | High |
|  | Yao (2022) | Scoping Review | CASP | Search transparency; descriptive synthesis; equity focus | High | High |
|  | Mukhuty (2022) | Integrative Thematic Literature Review | CASP | Thematic rigor; conceptual integration; policy relevance | High | High |
|  | Kolade (2022) | Systematic Review | CASP | Coherence review; theoretical integration; policy insight | High | High |
|  | Li (2022) | Longitudinal Panel Quantitative Study | NOS | Selection (3); comparability (2); robustness checks (3) | High | High |
|  | Heeks (2022) | Conceptual Theory-Building Study | CASP | Conceptual originality; theoretical grounding; applicability | High | High |
|  | Engzell (2021) * | Quasi-experimental Large-scale Study | NOS | Representativeness (3); comparability (3); outcome validity (3) | High | High |
|  | Lin (2021) | Simulation / Technical Design | CASP (Adapted for Modeling Studies) | Clear objectives; methodological transparency; validation via simulation; limitations addressed | High | High |
|  | Seifert (2021) | Conceptual/Policy-Oriented Analysis | CASP | Articulation problems; population relevance; policy insight | Moderate | Moderate |
|  | Bonina (2021) | Conceptual Review & Research Agenda | CASP | Conceptual clarity; synthesis depth; research framing | High | High |
|  | Ciarli (2021) | Conceptual/Evidence-informed Review | CASP | Analytical coherence; grounding literature; foresight value | High | High |
|  | Burrell (2021) | Critical Sociological Review | CASP | Theoretical depth; analytical rigor; societal relevance | High | High |
|  | Gran et al. (2021) . | Quantitative Survey & Cluster Analysis | NOS | Sampling (2); comparability (2); outcome analysis (3) | High | High |
|  | Aziz & Naima (2021) | Qualitative Conceptual–Empirical Study | CASP | Context sensitivity; analytical depth; theoretical contribution | High | High |
|  | Goudeau et al. (2021)* | Conceptual–Empirical Policy Analysis | CASP | Argument coherence; interdisciplinary grounding; policy relevance | High | High |
|  | OECD (2023) * | Policy Report / Comparative Analysis | CASP for Policy Research | Clear aims; use of evidence; relevance; stakeholder perspective; applicability | Moderate–High | Moderate |
|  | Twenge (2021) | Cross-sectional / Survey Analysis | NOS (Adapted) | Selection (2); comparability (2); outcome assessment (3) | High | High |
|  | Bashir (2021) * | Survey-based Pedagogical Study | CASP for Quantitative Studies | Clear research questions; appropriate design; response rate; transparency analysis | Moderate | Moderate |
|  | Khlaif (2021) * | Qualitative (Interviews + Observations) | CASP for Qualitative Studies | Theoretical coherence; method appropriateness; data triangulation; reflexivity | Moderate–High | Moderate |
|  | Pal (2021) | Quantitative (Survey + TAM/TTF Model) | CASP for Quantitative Studies | Clear aims; model fit; measurement validity; statistical rigor | High | High |
|  | Beaunoyer (2020) * | Conceptual / Review | CASP for Review Papers | Argument coherence; use of evidence; policy relevance; clarity | Moderate | Moderate |
|  | Du (2020) | Technical / Framework Development | CASP for Technical Studies | Conceptual grounding; validation logic; applicability; transparency | High | High |
|  | Livingstone (2020) | Mixed Methods (Qual + Quant) | CASP for Mixed Methods | Design justification; triangulation; reflexivity; analytical depth | High | High |
|  | Nguyen et al. (2020) | Cross-sectional quantitative survey (COVID-19 context) | CASP | Clear research aims; appropriate study design; adequate sample size (n=1,374); valid measurement of digital communication practices; consideration of sociodemographic variables (age, gender, living arrangement, internet skills); appropriate statistical analysis; relevance to digital inequality discourse | High | High |
|  | Xie (2020) | Policy / Commentary | CASP for Policy Research | Evidence-based argument; applicability; stakeholder focus; clarity | Moderate | Moderate |
|  | Wasserman (2020) | Review / Policy Analysis | CASP for Review Papers | Synthesis rigor; use of evidence; applicability; limitations noted | High | High |
|  | Martins Van Jaarsveld (2020) | Conceptual / Commentary | CASP for Review Papers | Argument coherence; evidence support; relevance; clarity | Moderate | Moderate |

**Methodological Notes:**

- **CASP** is used for qualitative, quantitative, review, and policy studies.
- **The NOS** or its adaptations are used for observational/survey studies with a focus on selection, comparability, and outcome assessment.
- A “High” rating is given if the study meets ≥80% of the criteria, “Moderate” if 50–79%, and “Low” if <50%.
- All studies were assessed based on **clarity of purpose, rigor of methods, transparency of analysis, and relevance of findings**.

# Table A2: Thematic Coding Agreement

| **ID Study** | **Author's (Year)** | **Theme** | | **Sub-Theme** | **Kappa Score**  **(Coder A)** | **Kappa Score (Coder B)** | **Kappa Score (Coder C-Researcher)** | **Agreement** |
| --- | --- | --- | --- | --- | --- | --- | --- | --- |
| S1 | Ali et al. (2024) | AI in Learning | | ChatGPT in Education | 0.75 | 0.70 | 0.82 | Very High |
| S2 | Álvarez-Otero et al. (2018) | Continuing Education Technology | | SDGs, WebGIS, TPACK | 0.68 | 0.72 | 0.80 | High |
| S3 | Apps et al. (2019) | Student Technology Practice | | Bourdieu's Theory of Practice, Digital Inequality | 0.71 | 0.69 | 0.78 | High |
| S4 | Arantes (2023) | AI Personalization in the Classroom | | Teacher Rights, Algorithmic Bias | 0.73 | 0.74 | 0.85 | Very High |
| S5 | Balli & Singla (2024) | Scale of EdTech Initiatives | | CLIx, Quantity, Diffusion, Quality | 0.70 | 0.68 | 0.79 | High |
| S6 | Chalmeta & Barbeito-Caamaño (2024) | Social Network for SDGs | | Sustainable Awareness, Social media | 0.72 | 0.71 | 0.81 | Very High |
| S7 | Cockerham (2024) | Participatory Action Research | | Adult-Youth Collaboration, Technology | 0.69 | 0.73 | 0.83 | Very High |
| S8 | Creed et al. (2024) | Inclusive AR/VR | | Accessibility, Disability | 0.76 | 0.75 | 0.87 | Very High |
| S9 | Eljak et al. (2024) | E-Learning & Cloud Computing | | Architecture, Security, SaaS, PaaS | 0.74 | 0.72 | 0.84 | Very High |
| S10 | Esposito (2024) | Digital Internationalization | | Virtual Exchange, Hybrid Place | 0.71 | 0.70 | 0.82 | Very High |
| S11 | Gligorea et al. (2023) | AI in Adaptive Learning | | Personalization, Learning Outcomes | 0.77 | 0.76 | 0.88 | Very High |
| S12 | Heath et al. (2024) | Social Media Audit as EdTech | | Algorithmic Discrimination, Ethics | 0.73 | 0.74 | 0.85 | Very High |
| S13 | Hübscher et al. (2024) | Continuing Marketing Education | | SDGs, MESD Framework | 0.70 | 0.71 | 0.81 | Very High |
| S14 | Kalogiannakis et al. (2021) | Gamification in Science | | Motivation, Theoretical Framework | 0.75 | 0.73 | 0.84 | Very High |
| S15 | Koole et al. (2024) | Decolonization of Educational Technology | | Global Inequality, Inclusion | 0.78 | 0.77 | 0.89 | Very High |
| S16 | Mac Fadden et al. (2024) | AI & Digital Inequality | | Sociological Perspective, Access | 0.76 | 0.75 | 0.87 | Very High |
| S17 | Macgilchrist (2019) | Cruel Optimism in EdTech | | Datafication, Educational Justice | 0.71 | 0.72 | 0.83 | Very High |
| S18 | Queiroga et al. (2024) | | Data-Driven for School Equity | School Factors, Education Policy | 0.74 | 0.73 | 0.85 | Very High |
| S19 | Kuhn et al. (2023) | Digital Inequality | | Theoretical Kaleidoscope, Postdigital | 0.74 | 0.73 | 0.86 | Very High |
| S20 | Korhonen et al. (2024) | Diversity Data Gaps | | Forestry Sector, Inclusion | 0.72 | 0.71 | 0.82 | Very High |
| S21 | McGarr (2023) | Sustainable Teacher Digital Competence | | SDGs, Teacher Education | 0.72 | 0.70 | 0.81 | High |
| S22 | Miller & Liu (2023) | Disaster Capitalism & Digital Inequality | | Post-COVID, Transforming Education | 0.75 | 0.73 | 0.84 | Very High |
| S23 | Pappas et al. (2018) | Inclusive Education | | Teacher Attitudes, Inclusion Policies | 0.71 | 0.69 | 0.80 | High |
| S24 | Pierce & Cleary (2024) | The Digital Divide in Education | | Access to Technology, Social Inequality | 0.76 | 0.75 | 0.86 | Very High |
| S25 | Marques Queiroga et al. (2024) | Data-Driven for School Equity | | School Factors, Education Policy | 0.75 | 0.74 | 0.86 | Very High |
| S26 | Regmi (2024) | Learning Technology & Global Inequality | | Generative AI, Lifelong Learning | 0.73 | 0.74 | 0.83 | Very High |
| S27 | Shaghaghi et al. (2022) | Multilingual Educational Video Translation | | Mother Tongue-Based Learning | 0.70 | 0.72 | 0.81 | High |
| S28 | Shenkoya & Kim (2023) | Digital Transformation of Higher Education | | Education 4.0, Gamification, AI | 0.77 | 0.76 | 0.87 | Very High |
| S29 | Sunny et al. (2024) | The Technology Gap in Education in India | | Access, Adoption, Digital Equality | 0.73 | 0.74 | 0.84 | Very High |
| S30 | Timsal et al. (2024) | Socio-Digital Disadvantage in Management Education | | Hidden Curriculum, Inequality of Access | 0.75 | 0.73 | 0.86 | Very High |
| S31 | UNESCO (2021) | AI and Education: A Policy Guide | | Inclusion, Ethics, AI Governance | 0.78 | 0.77 | 0.88 | Very High |
| S32 | Ventrella & Cotnam-Kappel (2024) * | Digital Capital & Inequality in Elementary Schools | | Teacher Perspective, Student Experience | 0.74 | 0.75 | 0.85 | Very High |
| S33 | Wang et al. (2024) | Meta-Analysis of Digital Device Use & Academic Achievement | | Purpose of Use, Duration, Moderator | 0.76 | 0.75 | 0.87 | Very High |
| S34 | Weisberg & Dawson (2024) | Digital Equality Mindset of Prospective Teachers | | Technology Integration, Inclusive Curriculum | 0.73 | 0.74 | 0.84 | Very High |
| S35 | Yang & Hong (2024) | The Technology Gap in Early Childhood Education | | Glocalization, Teacher Practices, Children's Learning | 0.72 | 0.71 | 0.82 | High |
| S36 | Zhan et al. (2022) | Bibliometric Analysis of STEM Education | | Global Distribution, Disciplinary Integration, Research Trends | 0.75 | 0.74 | 0.86 | Very High |
| S37 | Zhang (2024) | Transforming Education through Digital Technology | | Digital Platforms, Virtual/Augmented Reality | 0.71 | 0.72 | 0.83 | High |
| S38 | Capraro (2024) | The Impact of Generative AI on Socioeconomic Inequality | | Misinformation, Jobs, Education, Health | 0.77 | 0.76 | 0.88 | Very High |
| S39 | Timotheou (2023) | The Impact of Digital Technology on School Digital Capacity | | Digital Transformation, Supporting & Inhibiting Factors | 0.74 | 0.73 | 0.85 | Very High |
| S40 | Watch (2023) | The Dark Side of Generative AI (ChatGPT) | | Ethical, Social, Economic, Regulatory Risks | 0.76 | 0.75 | 0.87 | Very High |
| S41 | Vassilakopoulou (2023) | Digital Divide in Information Systems | | Contributing Factors, Research Agenda | 0.75 | 0.74 | 0.86 | Very High |
| S42 | Ren (2023) | Digital Finance & Industrial Structure Improvement | | Spatial Spillover, Innovation, Entrepreneurship | 0.73 | 0.72 | 0.84 | Very High |
| S43 | Star (2023) | Digital Health Literacy | | Sociodemographic Factors, Meta-Analysis | 0.76 | 0.75 | 0.87 | Very High |
| S44 | Lythreatis (2022) | Digital Divide: Overview & Research Agenda | | Factors, Levels, New Forms | 0.74 | 0.73 | 0.85 | Very High |
| S45 | Demir (2022) | Fintech, Financial Inclusion & Income Inequality | | Quantile Regression, Developing Countries | 0.75 | 0.74 | 0.86 | Very High |
| S46 | Yao (2022) | Digital Healthcare Inequality | | Scoping Review, the Determining Factor | 0.73 | 0.74 | 0.84 | Very High |
| S47 | Mukhuty (2022) | SDG & Industry 4.0 through Social Responsibility | | HRM, Human Barriers, Inclusive Practices | 0.74 | 0.75 | 0.85 | Very High |
| S48 | Kolade (2022) | Jobs 5.0: The Future of Work | | Digital Transformation, Socio-Technical Theory | 0.76 | 0.75 | 0.87 | Very High |
| S49 | Li (2022) | Digital Finance & Environmental Inequality | | Environmental Equity, Green Innovation | 0.75 | 0.74 | 0.86 | Very High |
| S50 | Heeks (2022) | Digital Inequality in the Global South | | Adverse Digital Incorporation | 0.77 | 0.76 | 0.88 | Very High |
| S51 | Engzell (2021) | Learning Loss due to School Closure (COVID-19) | | Netherlands, Education Gap | 0.74 | 0.73 | 0.85 | Very High |
| S52 | Lin (2021) | Satellite-Terrestrial Technology & Network Security | | Hybrid Beamforming, Energy Efficiency | 0.72 | 0.71 | 0.83 | High |
| S53 | Seifert (2021) | Double Exclusion: Digital & Social in the Elderly | | COVID-19, Long-Term Care Facilities | 0.75 | 0.74 | 0.86 | Very High |
| S54 | Bonina (2021) | Digital Platform for Development | | Research Agenda, Inclusion & Inequality | 0.76 | 0.75 | 0.87 | Very High |
| S55 | Ciarli (2021) | Digital Technology, Innovation & Skills | | Coevolution, Future Trajectory | 0.74 | 0.73 | 0.85 | Very High |
| S56 | Burrell (2021) | Algorithmic Society | | Coding Elite, Cybertariat, Actuarial Logic | 0.77 | 0.76 | 0.88 | Very High |
| S57 | Gran (2021) | Algorithmic Awareness as the New Digital Divide | | Awareness & Attitudes towards Algorithms | 0.75 | 0.74 | 0.86 | Very High |
| S58 | Aziz (2021) * | Digital Financial Inclusion in Bangladesh | | Critical Framework, Social Dynamics | 0.73 | 0.72 | 0.84 | Very High |
| S59 | Goudeau (2021) | Academic Achievement Gap during Lockdown | | COVID-19, Distance Learning, Social Class | 0.76 | 0.75 | 0.87 | Very High |
| S60 | OECD (2023) | OECD Digital Education Outlook 2023 | | Digital Ecosystem, AI, Education Policy | 0.78 | 0.77 | 0.89 | Very High |
| S61 | Twenge (2021) | Global Rise in Youth Loneliness | | The Influence of Smartphone & Internet Access | 0.76 | 0.75 | 0.87 | Very High |
| S62 | Bashir (2021) | Post-COVID Adaptation in Higher Education | | Bioscience Experience, Hybrid Learning | 0.74 | 0.73 | 0.85 | Very High |
| S6 3 | Khlaif (2021) | Student Engagement in COVID-19 Emergency Learning | | Infrastructure, Culture, Digital Inequality Factors | 0.75 | 0.74 | 0.86 | Very High |
| S64 | Pal (2021) | Student Perceptions of Video-Based Learning | | TAM/TTF Model, Gender, Digital Inequality | 0.73 | 0.74 | 0.84 | Very High |
| S65 | Beaunoyer (2020) | COVID-19 & Digital Inequality: The Reciprocal Impact | | Mitigation Strategies, Access & Digital Skills | 0.76 | 0.75 | 0.87 | Very High |
| S66 | Du (2020) | Supply Chain Fintech Innovation with Blockchain | | Efficiency, Transparency, Security | 0.72 | 0.71 | 0.83 | High |
| S67 | Livingstone (2020) | Parenting for a Digital Future | | Parents' Hopes & Fears, Digital Literacy | 0.75 | 0.74 | 0.86 | Very High |
| S68 | Nguyen (2020) | Changes in Digital Communication During the Pandemic | | Implications of Digital Inequality, Research Agenda | 0.74 | 0.73 | 0.85 | Very High |
| S69 | Xie (2020) | Digital Inclusion for Seniors During COVID-19 | | Access to Information, Services, Social Connectedness | 0.75 | 0.74 | 0.86 | Very High |
| S70 | Wasserman (2020) | Adapting Suicide Prevention Strategies During the Pandemic | | Mental Health, Evidence-Based Interventions | 0.73 | 0.72 | 0.84 | Very High |
| S71 | Jaarsveld (2020) | The Impact of COVID-19 on the Elderly & the Importance of Closing the Digital Divide | | Mental Health, Access to Technology | 0.74 | 0.73 | 0.85 | Very High |
